# Supplementary material for: The LPS-inducible lncRNA Mirt2 is a negative regulator of inflammation
Source: Nat Commun. 2017 Dec 11;8:2049. doi: 10.1038/s41467-017-02229-1 (PMC5725456; doi:10.1038/s41467-017-02229-1)
Supplement: Supplementary file 1 — Supplementary information [file 41467_2017_2229_MOESM1_ESM.pdf]

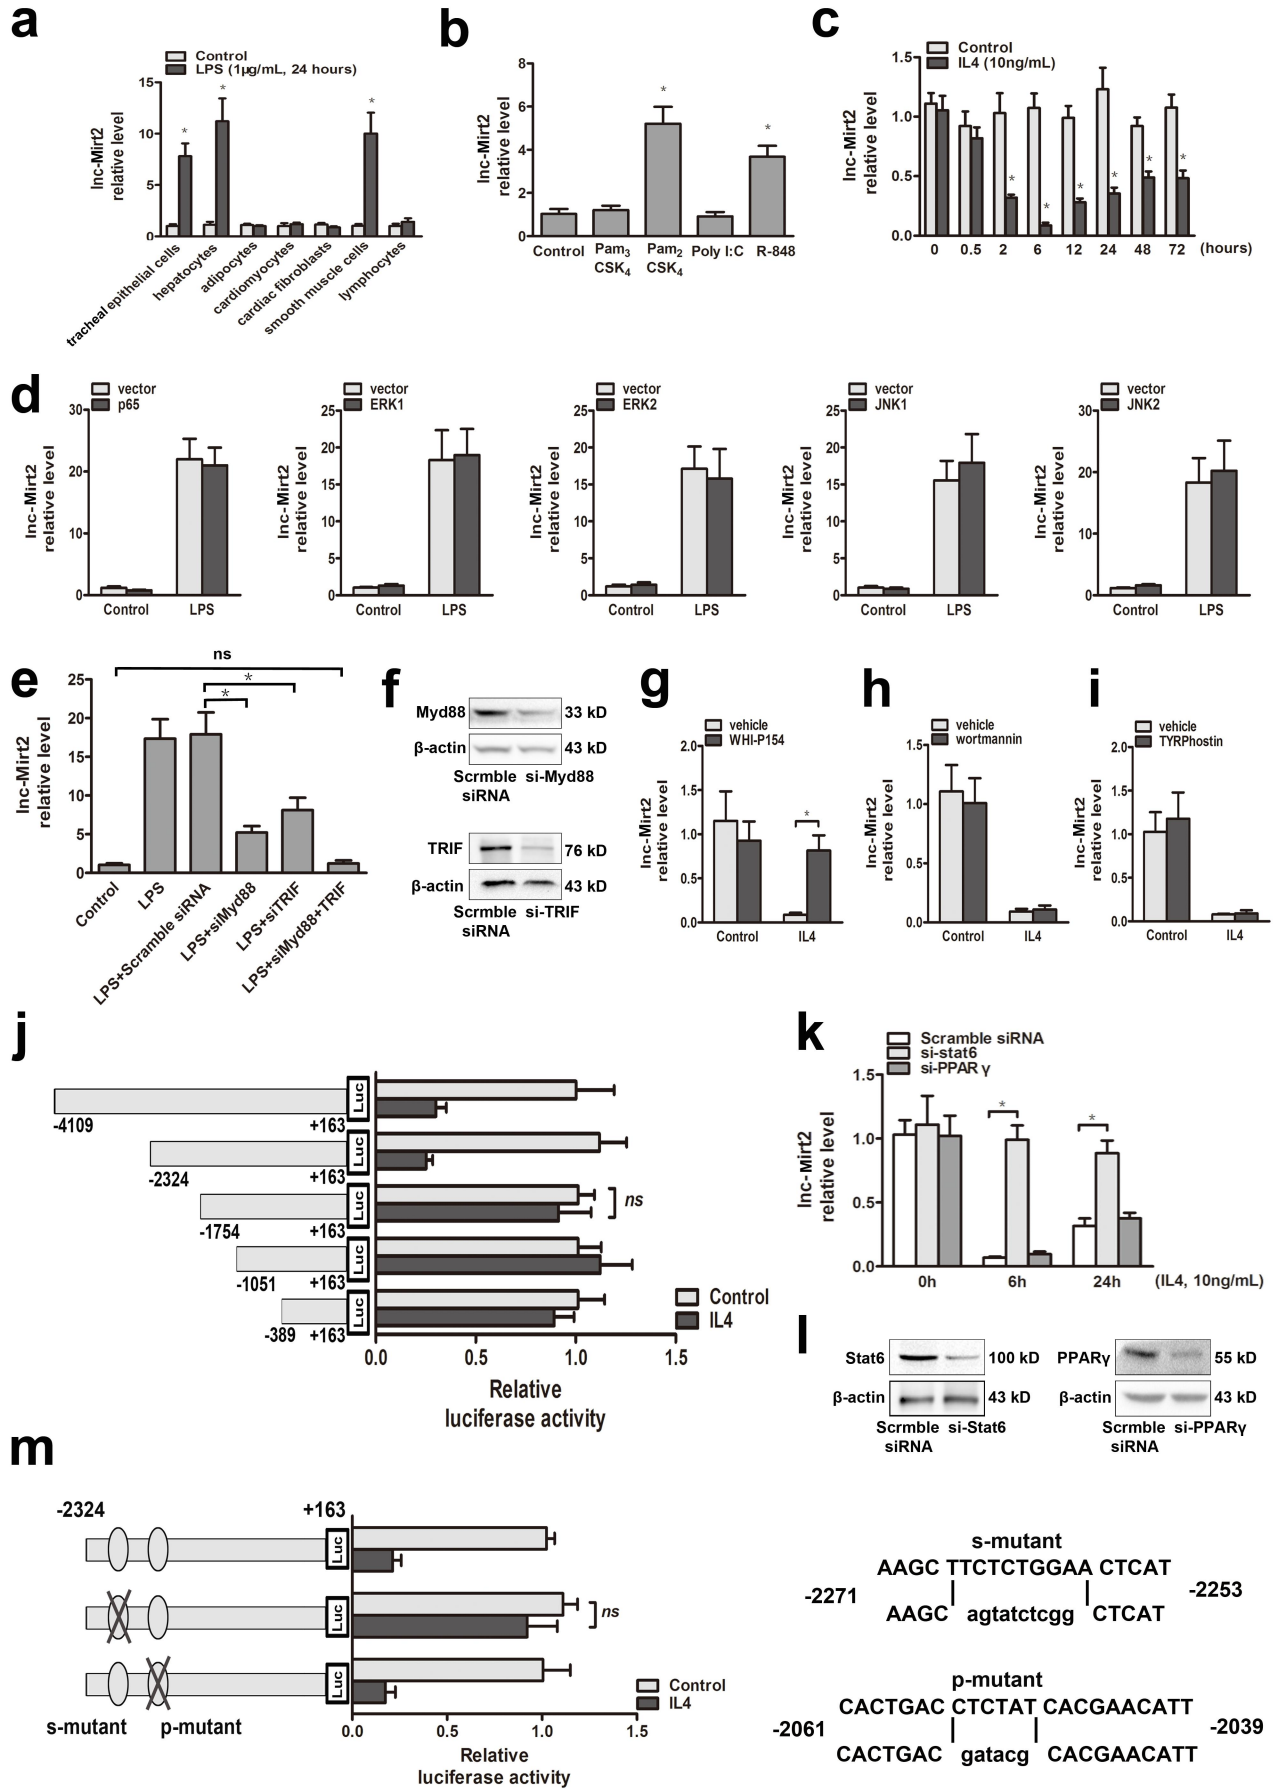

**Supplementary Figure 1. IL-4 inhibites Mirt2 expression in macrophages via Jak-Stat6 signaling pathway.** **(a)**, The expression of Mirt2 in several kinds of cells treated with LPS (1  $\mu\text{g/mL}$ , 24h). **(b)**, The expression of Mirt2 in cultured peritoneal macrophages treated with other TLR ligands, that is, Pam<sub>3</sub>CSK<sub>4</sub> (TLR2/1, 300 ng/mL), Pam<sub>2</sub>CSK<sub>4</sub> (TLR2/6, 100 ng/mL), Poly (I:C) (TLR3, 25  $\mu\text{g/mL}$ ) and R848 (TLR7/8, 10  $\mu\text{mol/L}$ ). **(c)**, The expression of Mirt2 in cultured peritoneal macrophages treated with IL-4 for different times. **(d)**, Effects of p65, ERK1, ERK2, JNK1 or JNK2 overexpression on the expression of Mirt2 in macrophages. **(e)**, Effects of Myd88 or TRIF knockdown on the expression of Mirt2 in macrophages treated with LPS (1  $\mu\text{g/mL}$ , 24h). **(f)**, The knockdown efficiencies for Myd88 and TRIF siRNAs. **(g-i)**, Macrophages were pretreated with selective pharmacological inhibitors wortmannin (PI3K), TYRPhostin (Jak2) or WHI-P154 (Jak3), then cells were treated with IL-4. Expression of Mirt2 was detected by qRT-PCR. **(j)**, Luciferase reporter constructs containing Mirt2 promoter or its truncations were co-transfected with an internal control plasmid pRL-TK into RAW264.7 cells, followed by IL-4 stimulation. The relative luciferase activities are expressed as a percent of values determined in control group. **(k)**, Stat6 or PPAR $\gamma$  in macrophages was knocked down before IL-4 stimulation. Expression of Mirt2 was detected by qRT-PCR. **(l)**, The knockdown efficiency for Stat6 siRNA. **(m)**, Luciferase reporter constructs containing Mirt2 promoter (-2324bp  $\sim$  +163bp) or its mutants (s-mutant for Stat6 binding site; p-mutant for PPAR $\gamma$  binding site) were co-transfected with an internal control plasmid pRL-TK into RAW264.7 cells, followed by IL-4 stimulation. The left panel demonstrates the relative luciferase activities, which are expressed as a percent of values determined in control group. The right panel demonstrates

the mutation for Stat6 and PPAR $\gamma$  binding sites. Data represent the mean  $\pm$  SEM of three independent experiments. \*  $P < 0.05$ . *ns*, none significant. Two-tailed Student's t-test for two groups and one-way ANOVA for multiple groups.

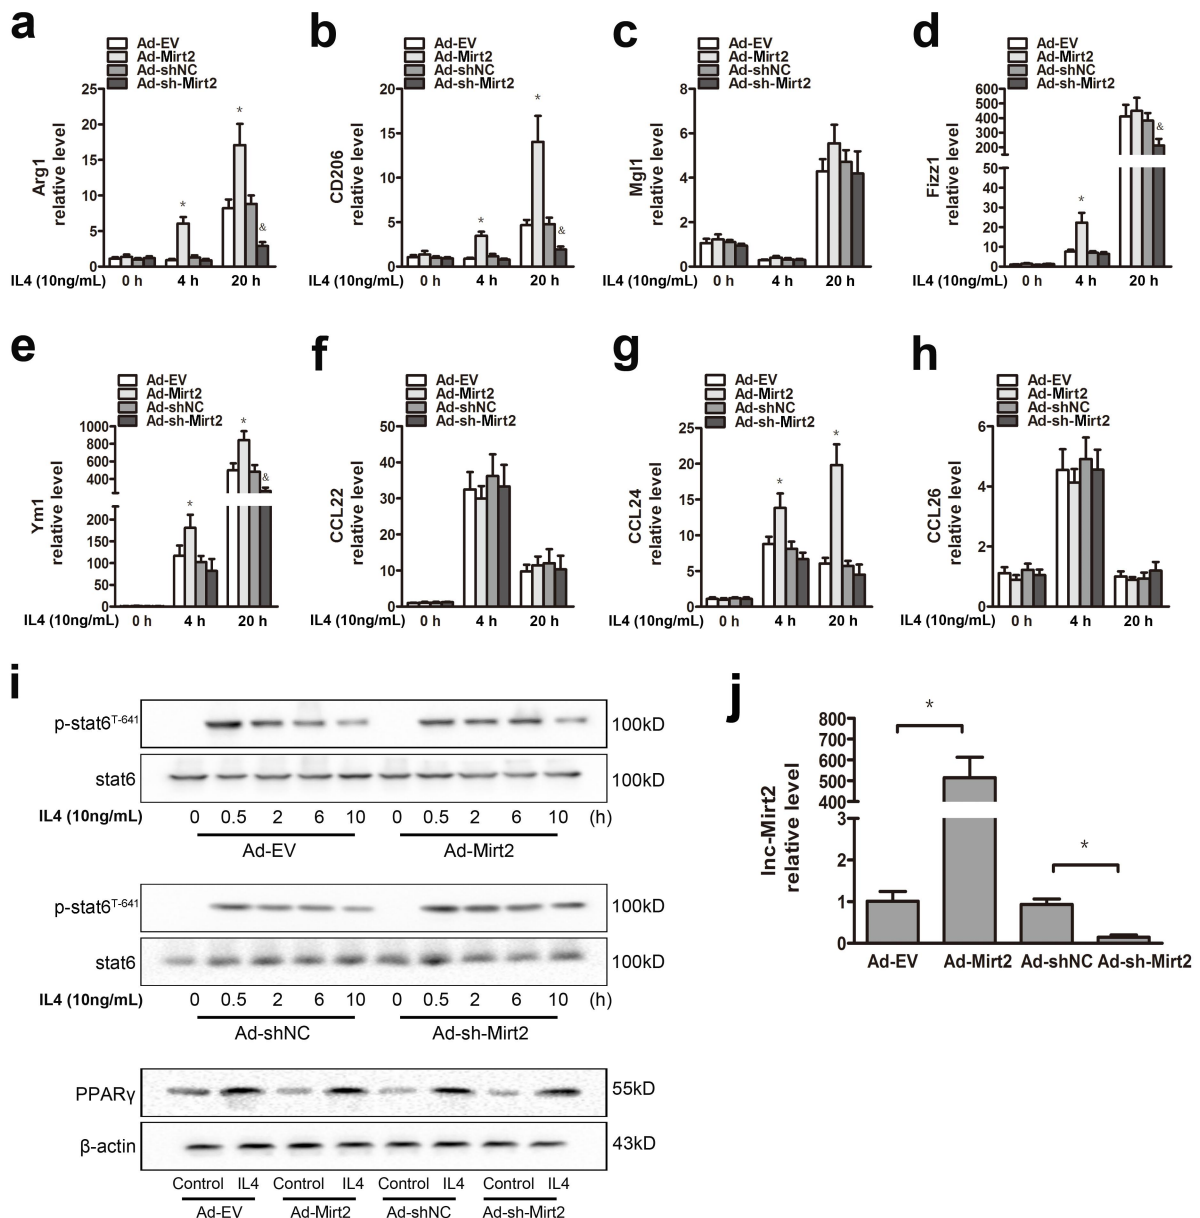

**Supplementary Figure 2. Mirt2 promotes IL-4-induced macrophage M2 polarization.**

(a-h), Effects of Mirt2 overexpression or Mirt2 knockdown on the expression of M2 markers and cytokines induced by IL-4 in cultured peritoneal macrophages, as determined by

qRT-PCR. Data represent the mean  $\pm$  SEM of three independent experiments. \*  $P < 0.05$  vs. Ad-EV or Ad-shNC group. **(i)**, Effects of Mirt2 overexpression or Mirt2 knockdown on Stat6 phosphorylation and PPAR $\gamma$  expression induced by IL-4 in cultured peritoneal macrophages, as determined by Western blot. **(j)**, The adenovirus infection efficiency was examined by qRT-PCR. One-way ANOVA for multiple groups.

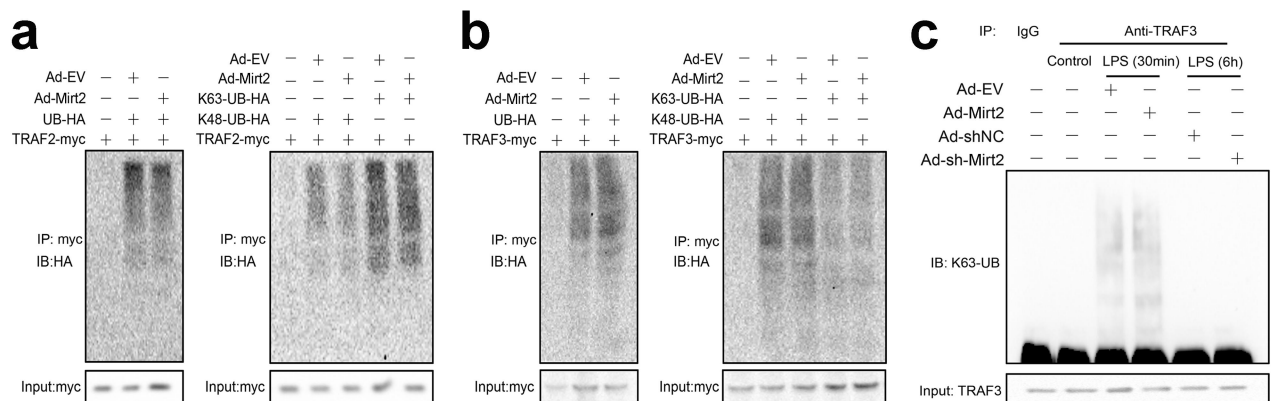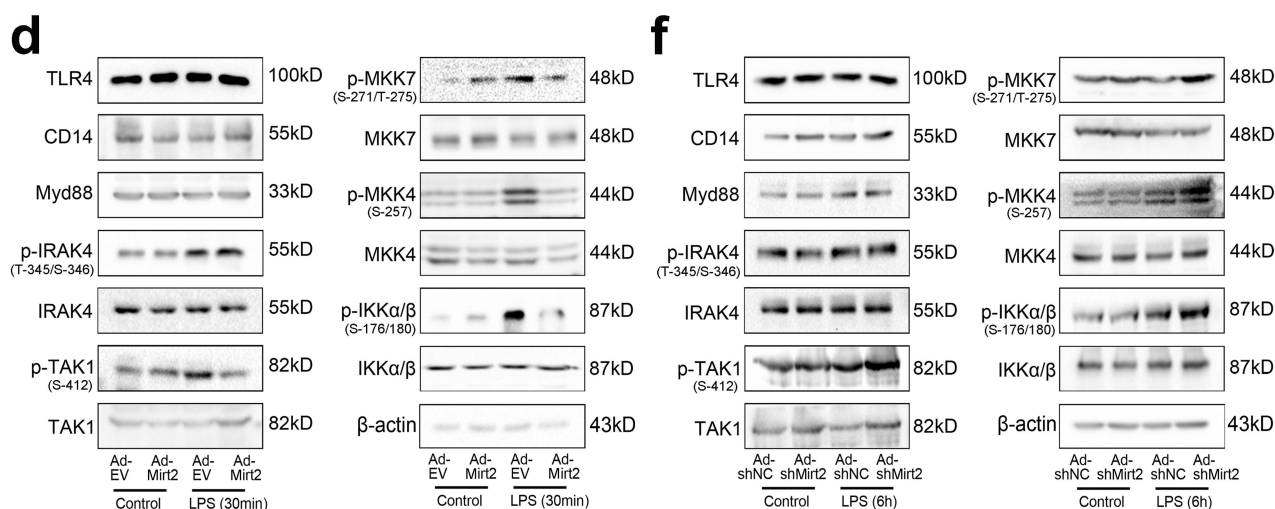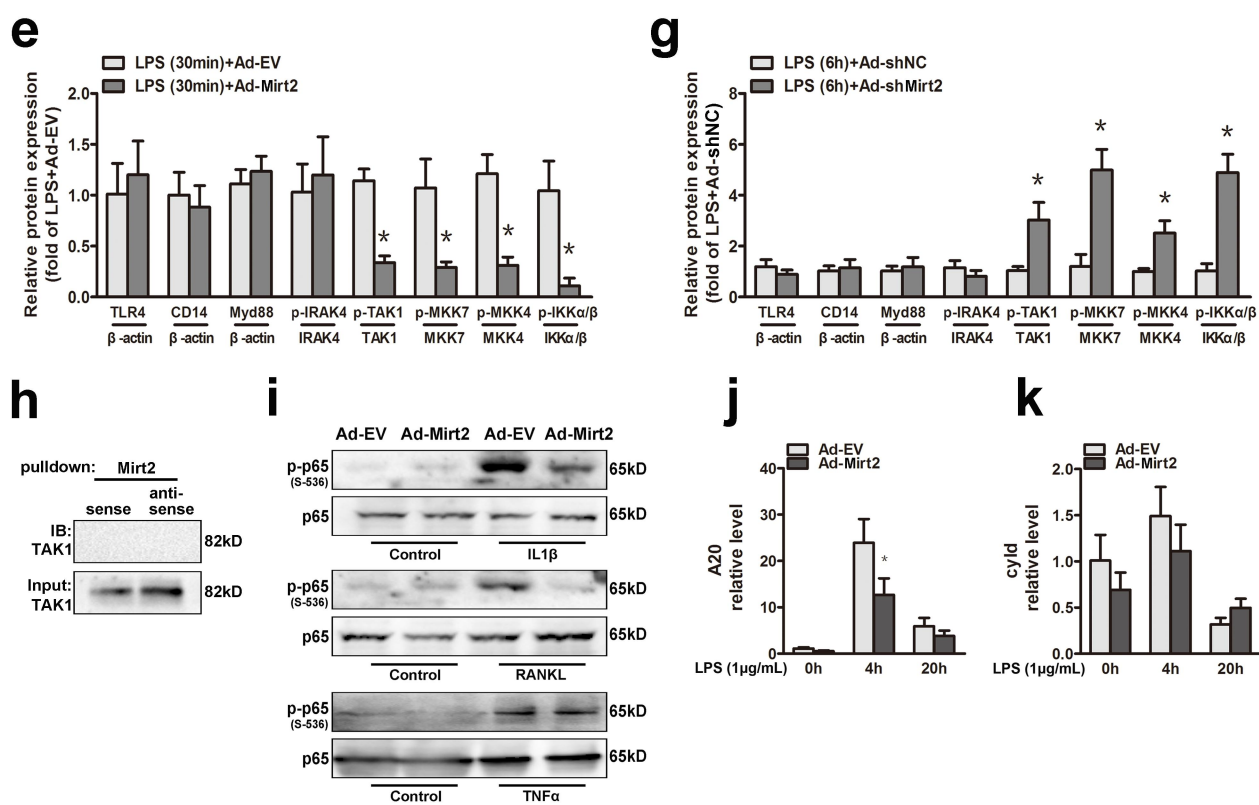

**Supplementary Figure 3. Mirt2 has no effects on the auto-ubiquitination of TRAF2 and TRAF3.** **(a)**, Immunoblot analysis of the ubiquitination of TRAF2 in HEK293T cells transfected to express myc-tagged TRAF2 and HA-tagged ubiquitin (UB-HA, K48-UB-HA or K63-UB-HA) in the presence or absence of Mirt2, assessed after immunoprecipitation with anti-myc antibody. **(b)**, Immunoblot analysis of the ubiquitination of TRAF3 in HEK293T cells transfected to express myc-tagged TRAF3 and HA-tagged ubiquitin (UB-HA, K48-UB-HA or K63-UB-HA) in the presence or absence of Mirt2, assessed after immunoprecipitation with anti-myc antibody. **(c)**, Immunoblot analysis of the K63-linked ubiquitination of endogenous TRAF3 in Mirt2-overexpression or Mirt2-knockdown peritoneal macrophages treated with LPS, assessed after immunoprecipitation with TRAF3 antibody. **(d)**, Effects of Mirt2 overexpression on the activation of TLR4-related signaling proteins induced by LPS, as determined by Western blot. **(e)**, Quantification of band density in panel **d**. **(f)**, Effects of Mirt2 knockdown on the activation of TLR4-related signaling proteins induced by LPS, as determined by Western blot. **(g)**, Quantification of band density in panel **f**. **(h)**, Immunoblotting analysis of proteins in macrophages that are bound to biotinylated Mirt2 or its antisense using anti-TAK1 antibody. **(i)**, Effects of Mirt2 on the phosphorylation of p65 induced by IL-1 $\beta$ , RANKL or TNF in macrophages. **(j, k)**, Effects of Mirt2 overexpression on the expression of de-ubiquitination enzymes A20 and cyld in macrophages, as determined by qRT-PCR. Data are expressed as mean  $\pm$  SEM of three independent experiments. \*  $P < 0.05$  vs. Ad-EV or Ad-shNC group. Two-tailed Student's t-test for two groups.

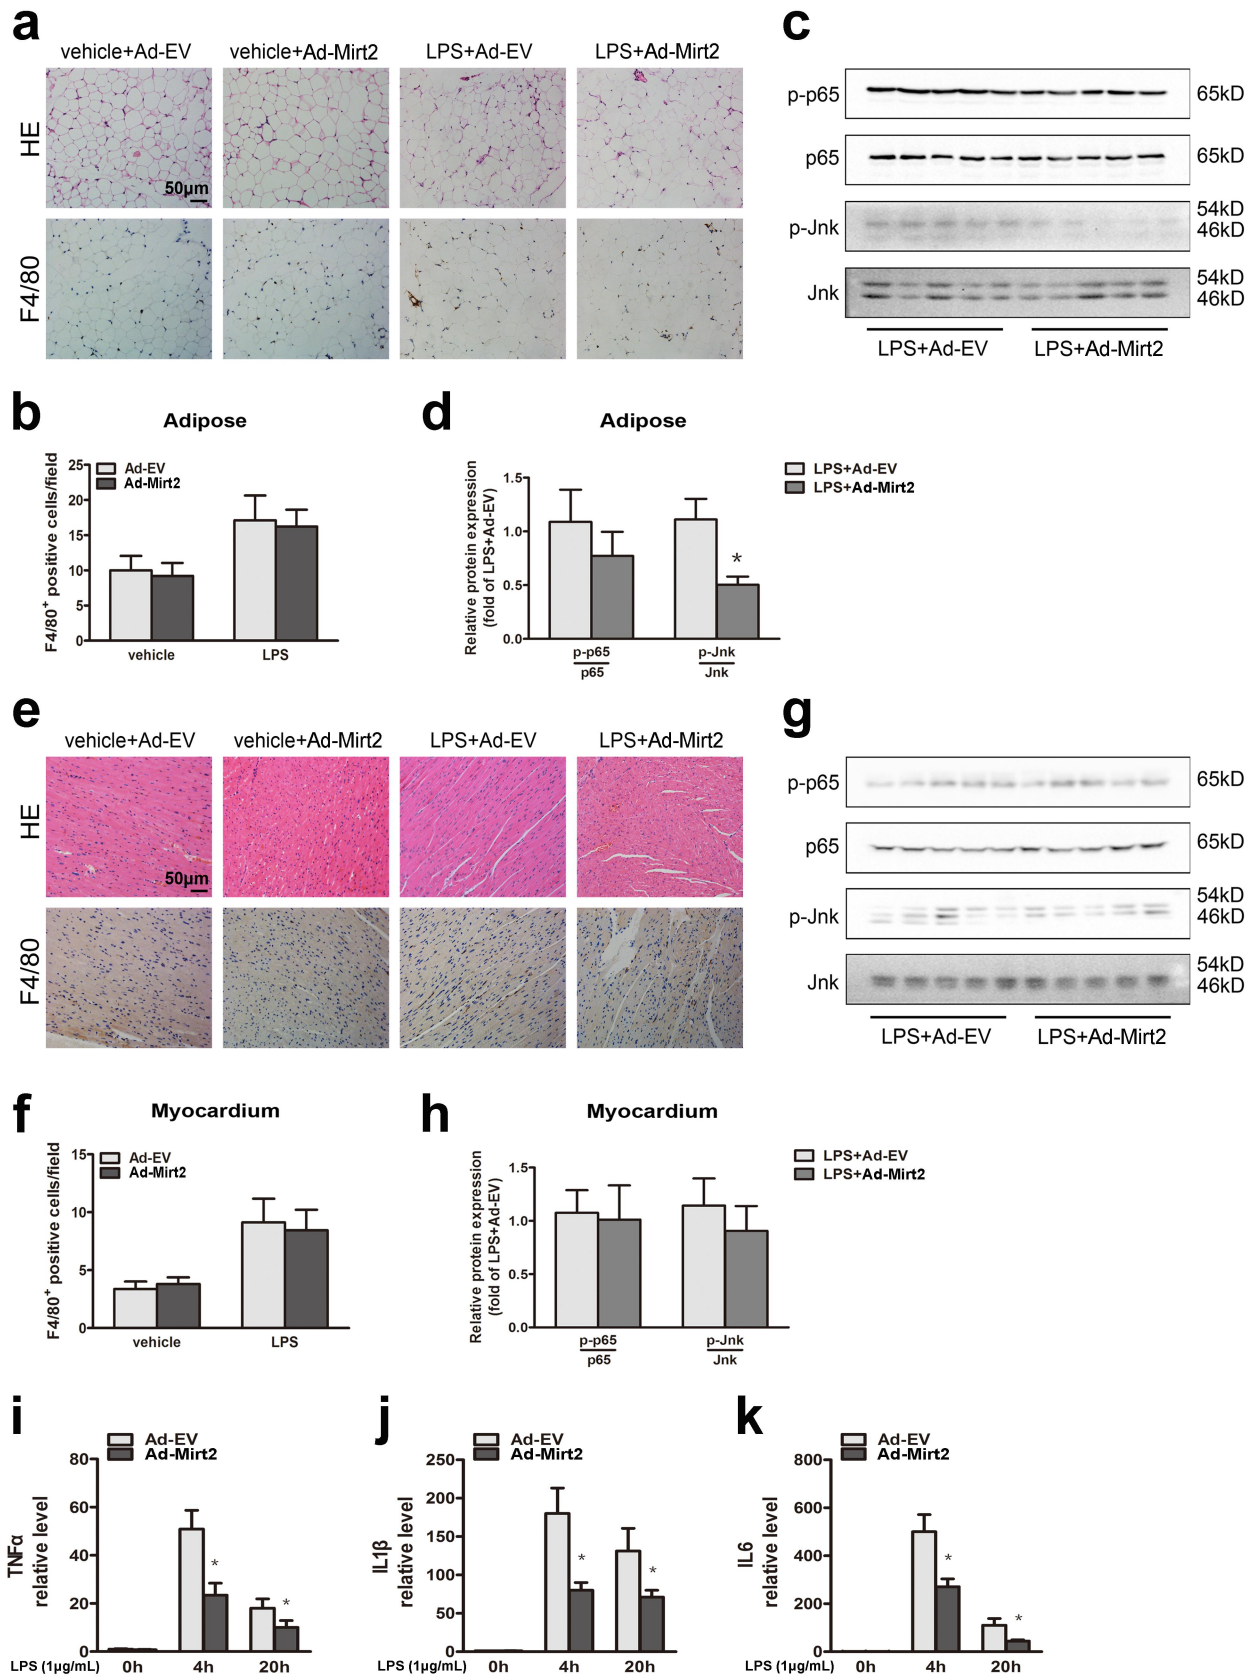

**Supplementary Figure 4. The effects of Mirt2 on the inflammatory responses of adipose and myocardium in LPS-induced endotoxemia.** Endotoxemia was induced in C57BL/6 mice by intraperitoneal injection of LPS (25 mg/kg), and control animals were administered with equivalent volumes of normal saline. Adenovirus (Ad-Mirt2 or Ad-EV) were delivered into mice by tail vein injection 3 days before LPS challenge. **(a)**, Histopathology in adipose of Ad-EV or Ad-Mirt2 treated mice 24 h after LPS challenge. *Upper panel*: Hematoxylin and eosin staining; *Lower panel*: Immunohistochemical staining for macrophage marker F4/80. **(b)**, Quantitative analysis of F4/80 positive cells. Data are expressed as mean  $\pm$  SEM (n=8). **(c)**, Western blot analysis for the phosphorylation of p65 and Jnk in adipose of endotoxemia mice treated with Ad-Mirt2 or Ad-EV. **(d)**, Quantification of band density in panel c. Data are expressed as mean  $\pm$  SEM (n=5). \*  $P < 0.05$  vs. Ad-EV group. **(e)**, Histopathology in myocardium of Ad-EV or Ad-Mirt2 treated mice 24 h after LPS challenge. *Upper panel*: Hematoxylin and eosin staining; *Lower panel*: Immunohistochemical staining for macrophage marker F4/80. **(f)**, Quantitative analysis of F4/80 positive cells. Data are expressed as mean  $\pm$  SEM (n=8). **(g)**, Western blot analysis for the phosphorylation of p65 and Jnk in myocardium of endotoxemia mice treated with Ad-Mirt2 or Ad-EV. **(h)**, Quantification of band density in panel g. Data are expressed as mean  $\pm$  SEM (n=5). **(i-k)**, Adenovirus (Ad-Mirt2 or Ad-EV) were delivered into mice by tail vein injection. After 3 days, primary peritoneal macrophages were prepared, cultured in vitro and challenged with LPS (1  $\mu$ g/mL) for 4 and 20 hours. The expression of TNF, IL-1 $\beta$  and IL-6 were determined by qRT-PCR. Data are expressed as mean  $\pm$  SEM of three independent experiments. \*  $P < 0.05$  vs. Ad-EV group. Two-tailed Student's t-test for two groups.

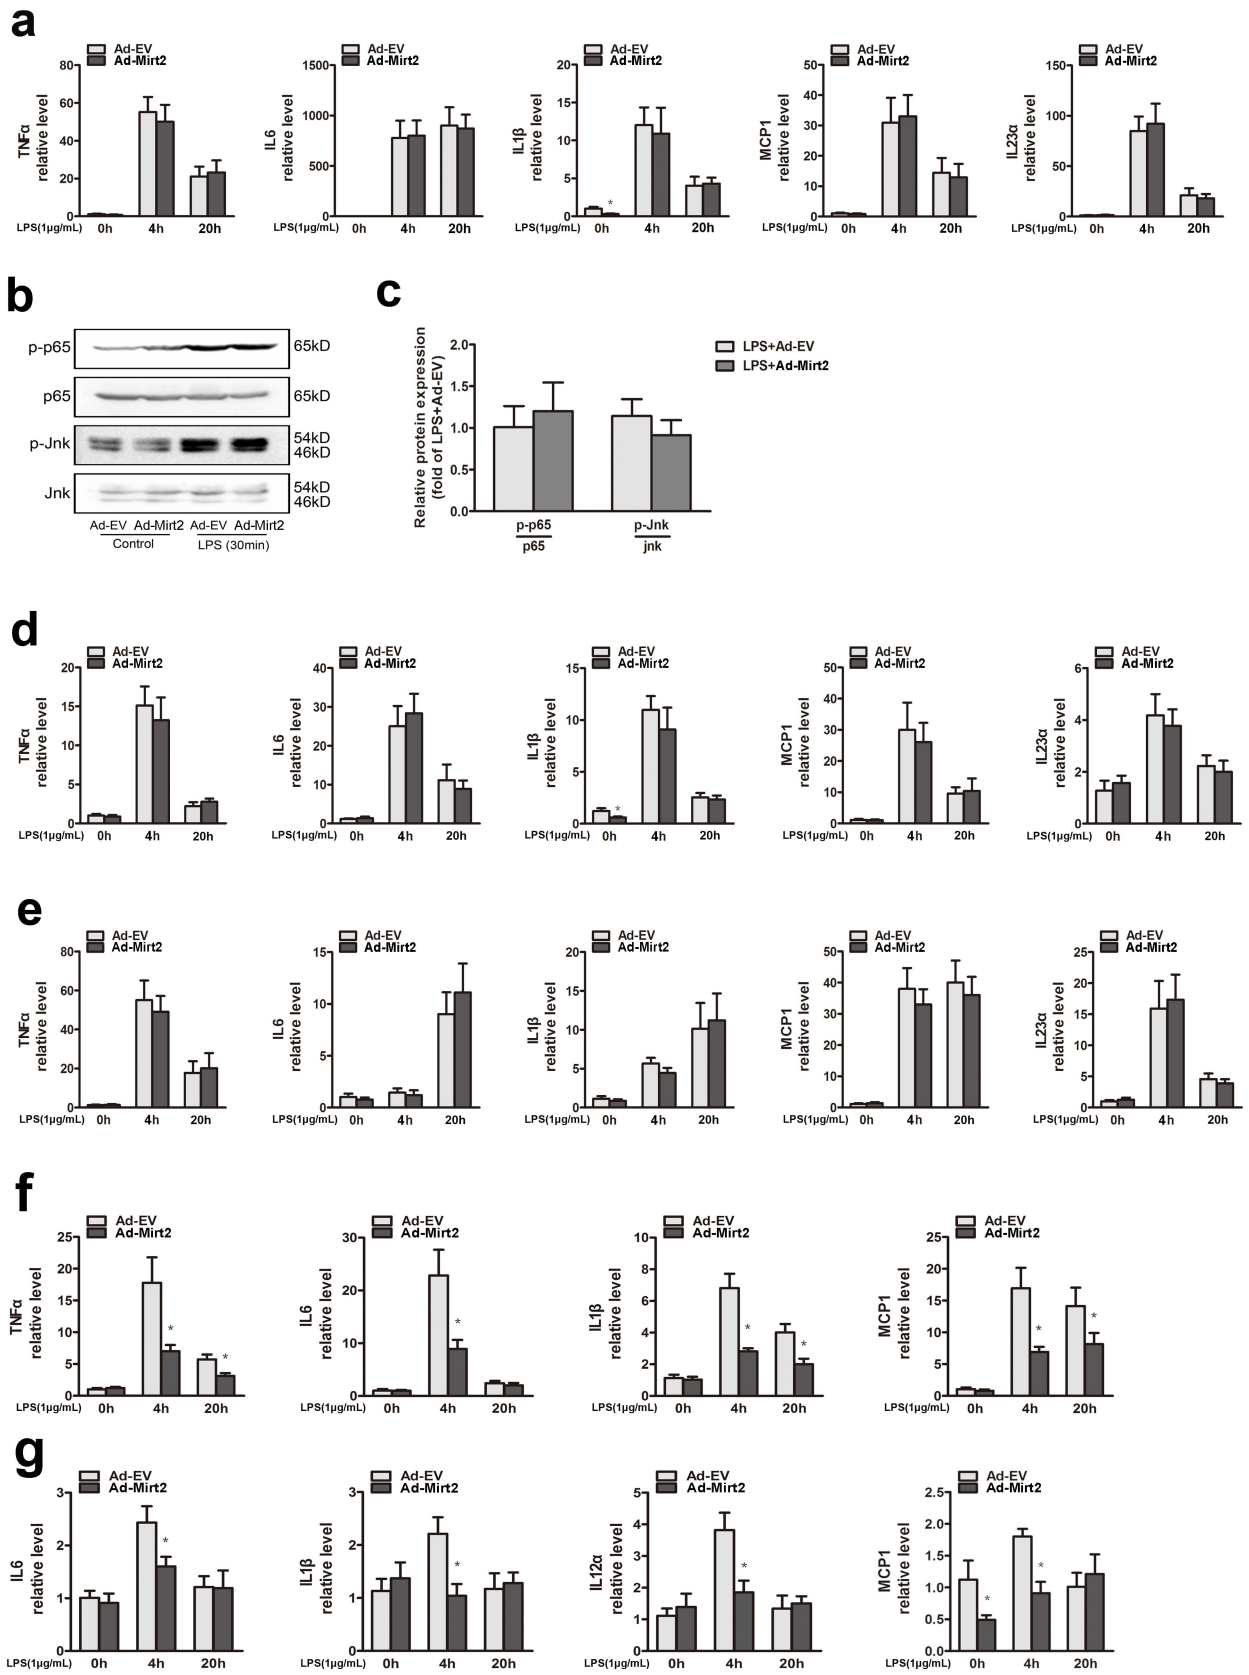

**Supplementary Figure 5. The effects of Mirt2 on the inflammatory responses of adipocytes, cardiomyocytes and cardiac fibroblasts. (a),** Effects of Mirt2 on the expression of inflammatory factors in murine adipocytes, as determined by qRT–PCR. **(b),** Effects of Mirt2 on the phosphorylation of p65 and Jnk in murine adipocytes, as determined by Western blot. **(c),** Quantification of band density in panel **b**. **(d),** Effects of Mirt2 on the expression of inflammatory factors in murine cardiomyocytes, as determined by qRT–PCR. **(e),** Effects of Mirt2 on the expression of inflammatory factors in murine cardiac fibroblasts, as determined by qRT–PCR. **(f),** Effects of Mirt2 on the expression of inflammatory factors in human monocyte-derived macrophages, as determined by qRT–PCR. **(g),** Effects of Mirt2 on the expression of inflammatory factors in human hepatocytes, as determined by qRT–PCR. Data represent the mean  $\pm$  SEM of three independent experiments. \*  $P < 0.05$  vs. Ad-EV group. Two-tailed Student’s t-test for two groups.

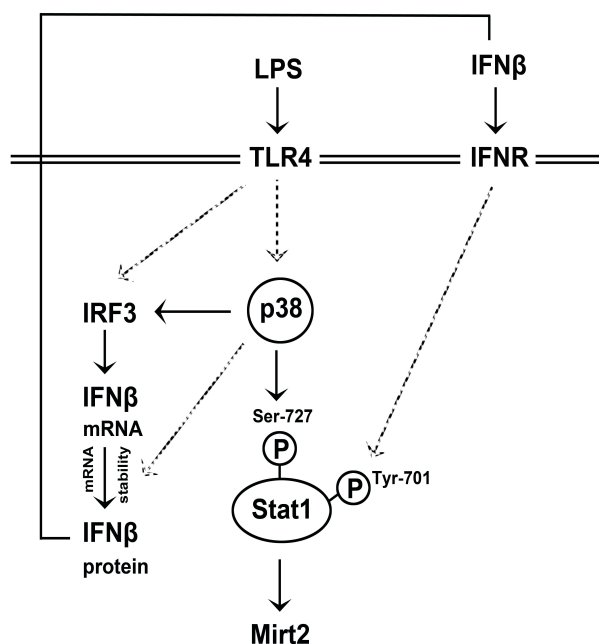

**Supplementary Figure 6. The possible regulation mechanisms on Mirt2 expression.**

Activation of LPS-p38-Stat1 (Ser-727) and LPS-IFN- $\alpha/\beta$ -Stat1 (Tyr-701) pathways transcriptionally promoted the expression of lncRNA Mirt2.

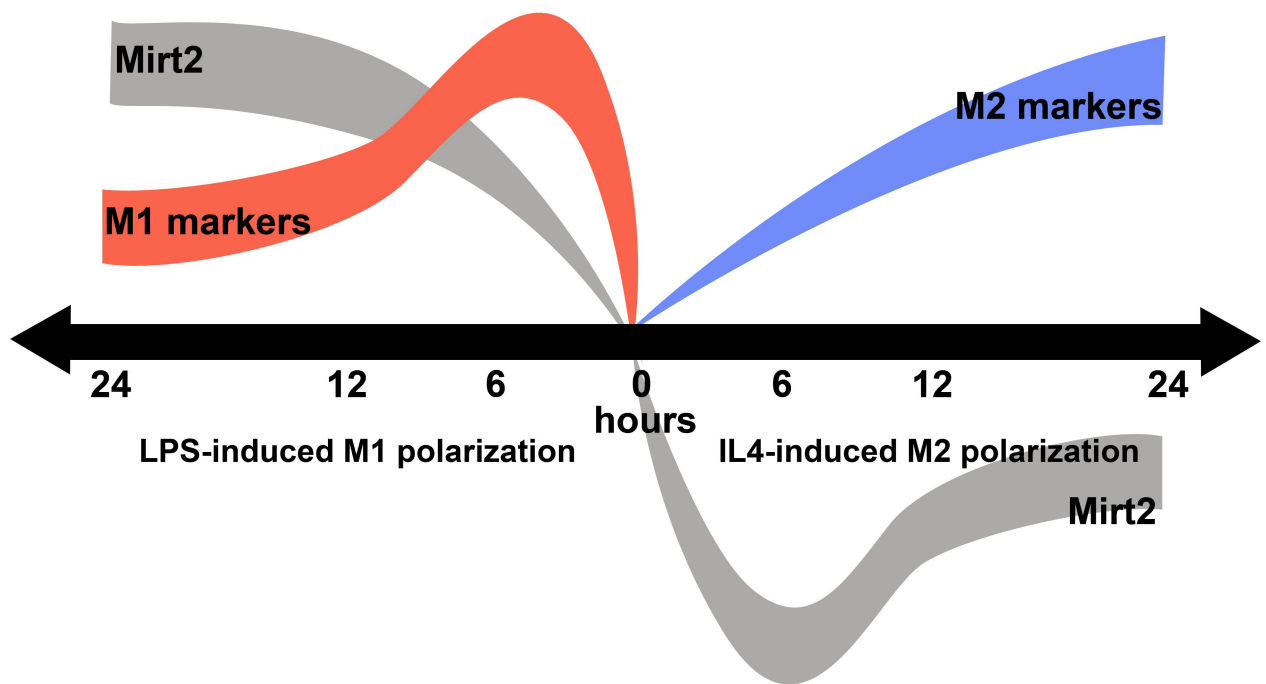

**Supplementary Figure 7. The relative levels of Mirt2 and related markers of classical M1 and alternative M2 macrophages, induced by LPS and IL-4 respectively.**

**Figure 1d**

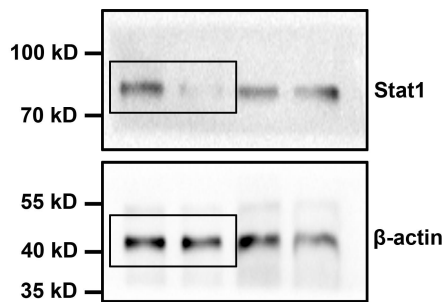

**Figure 1k**

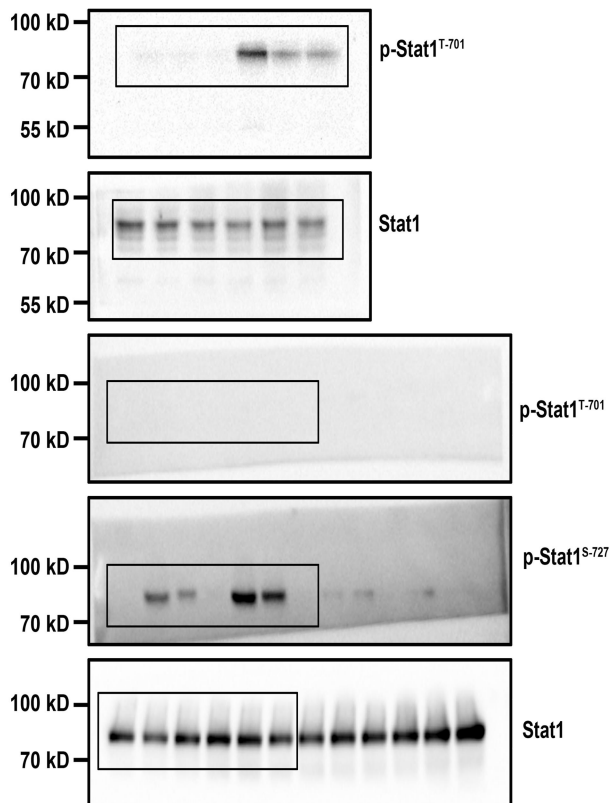

**Figure 4g**

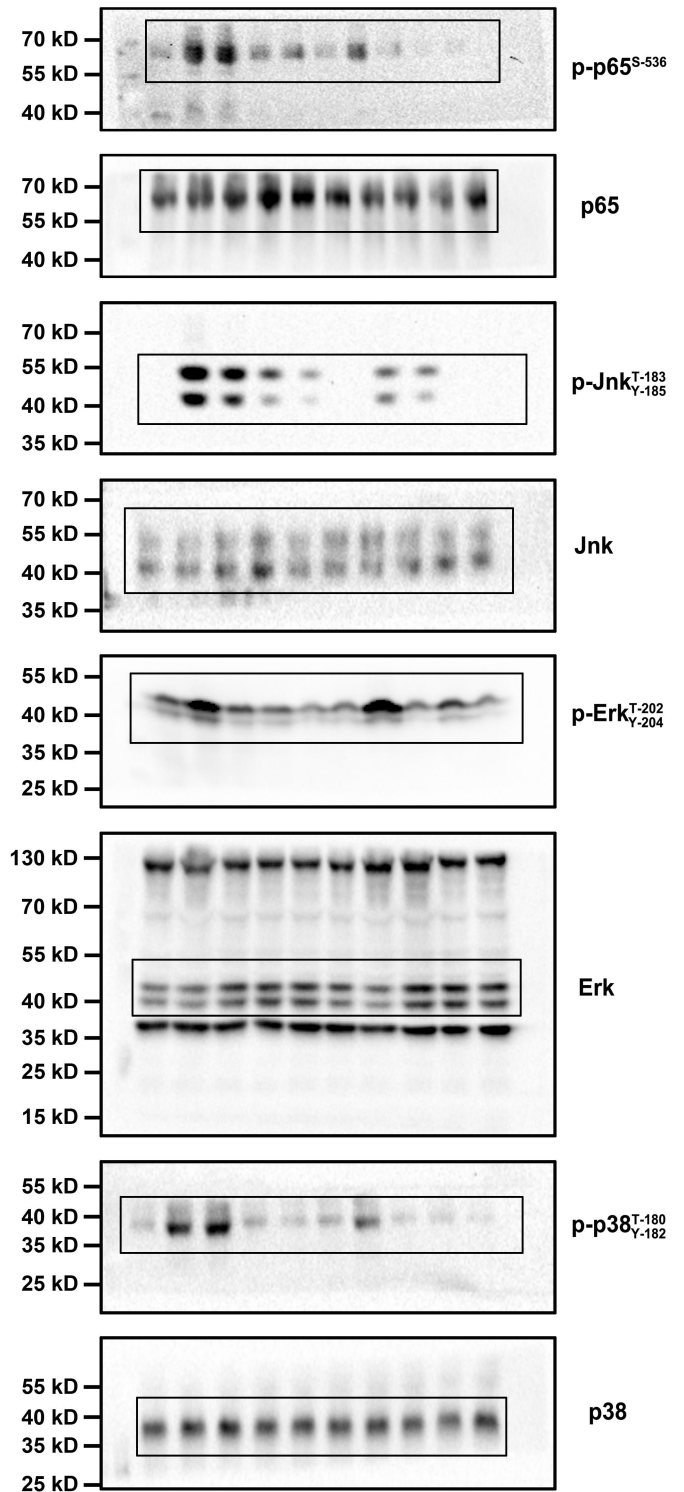

**Figure 4g**

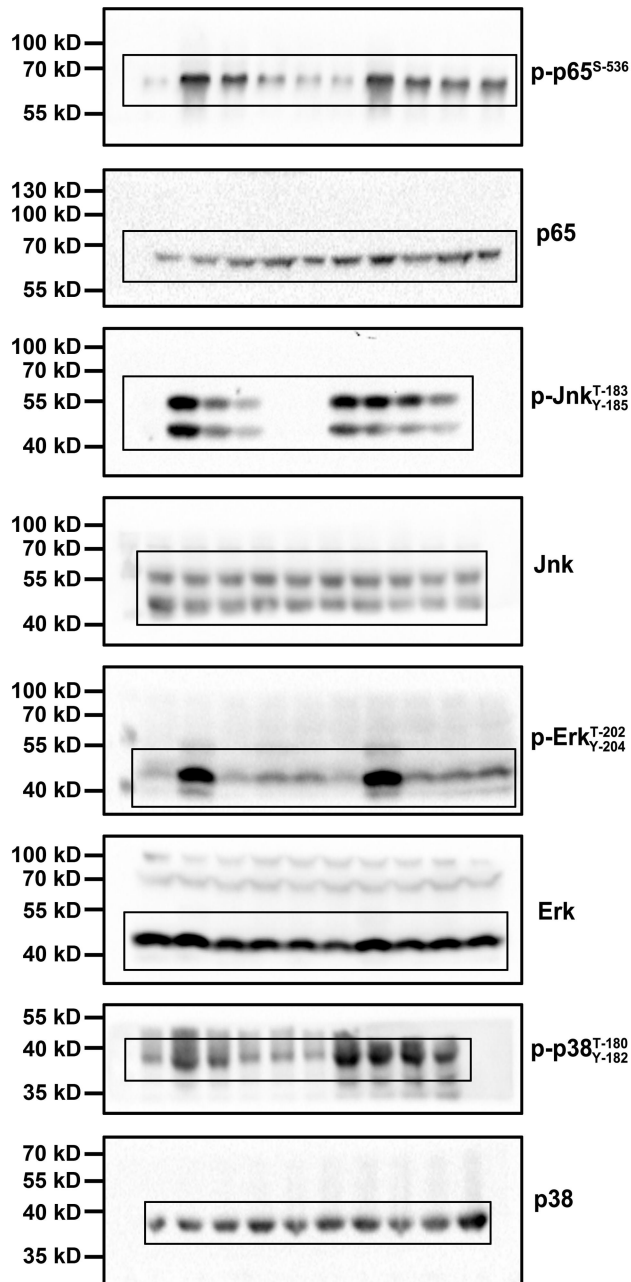

**Figure 5a**

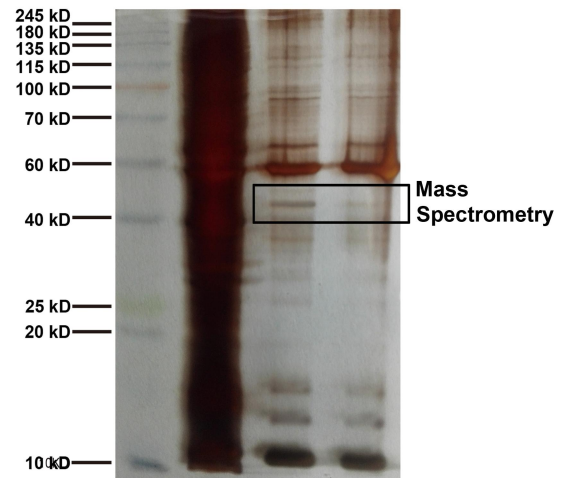

**Figure 5b**

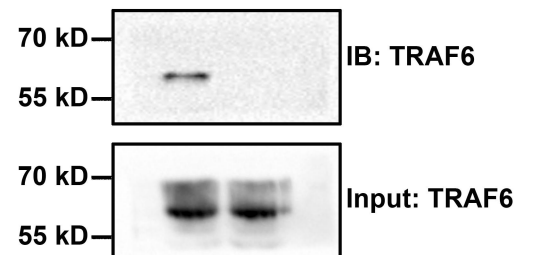

**Figure 5e**

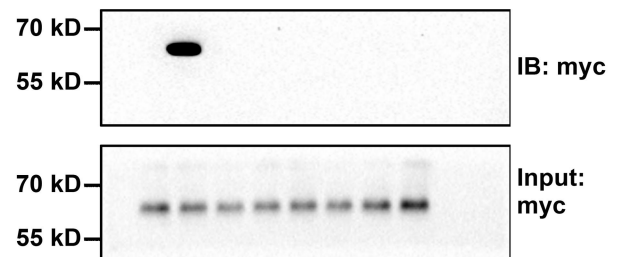

**Figure 5f**

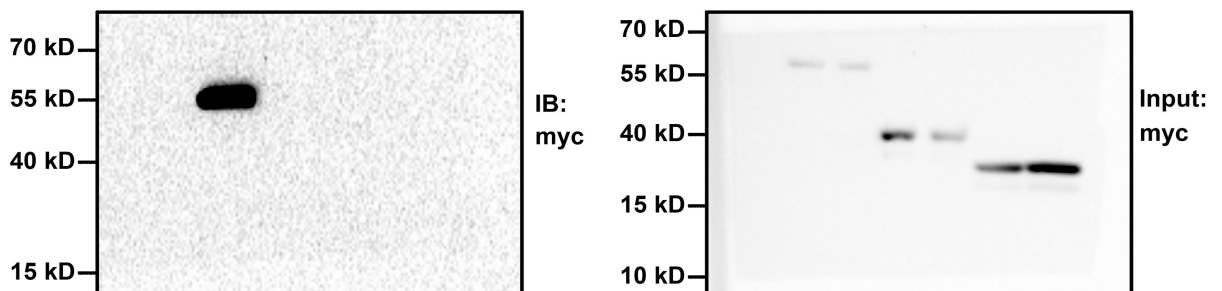

**Figure 5f**

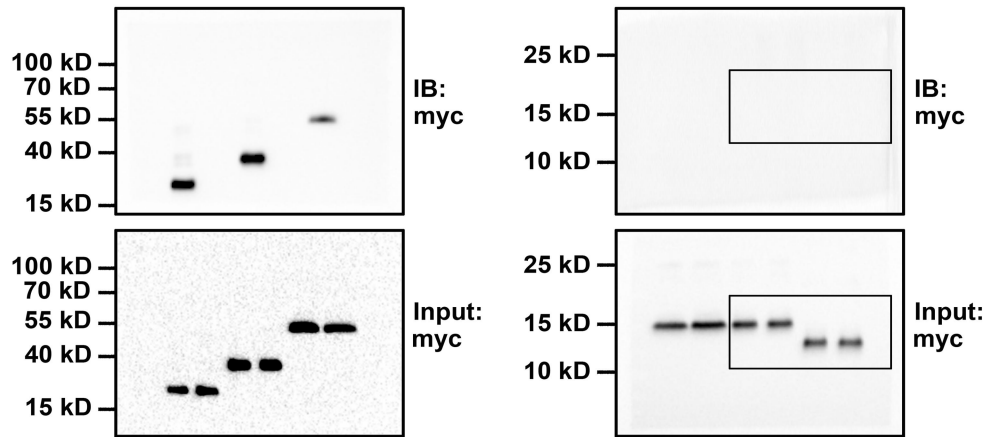

**Figure 5i**

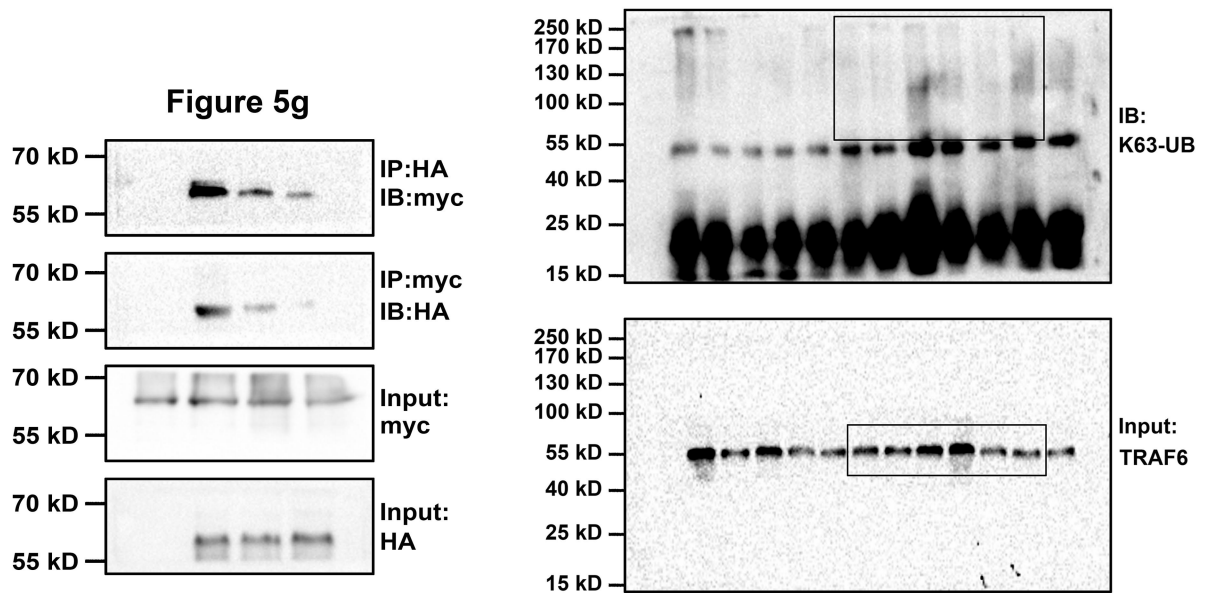

**Figure 5g**

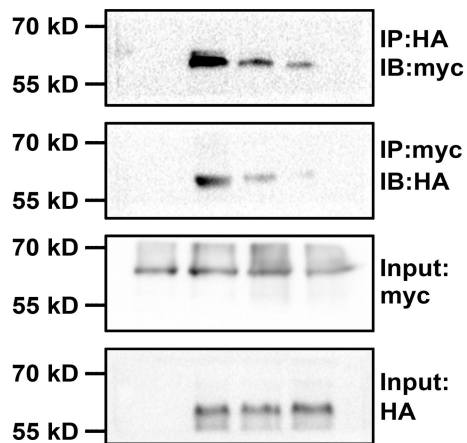

**Figure 5h**

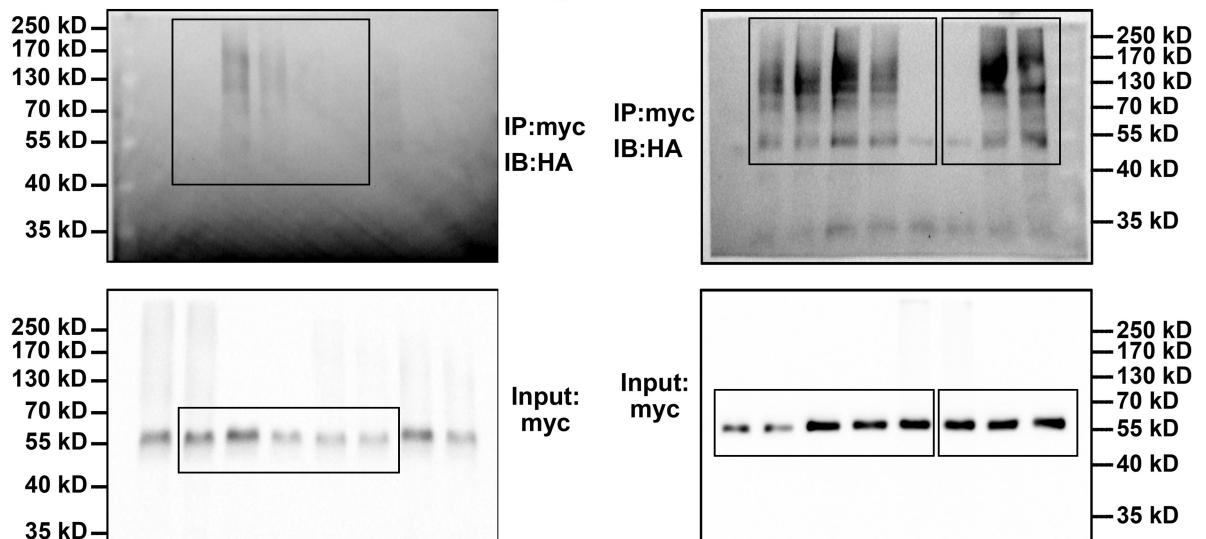

Figure 5j

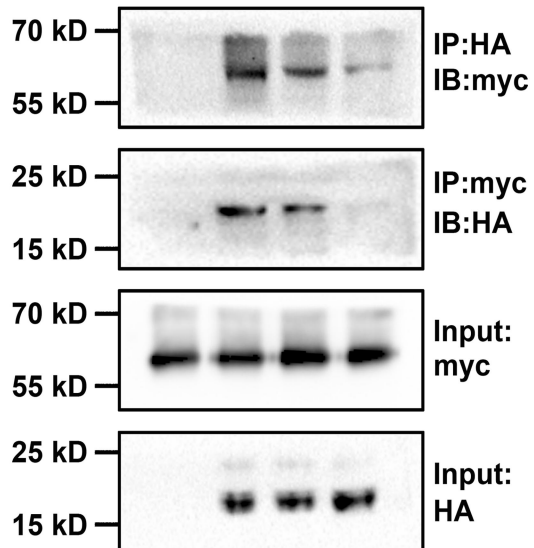

Figure 5k

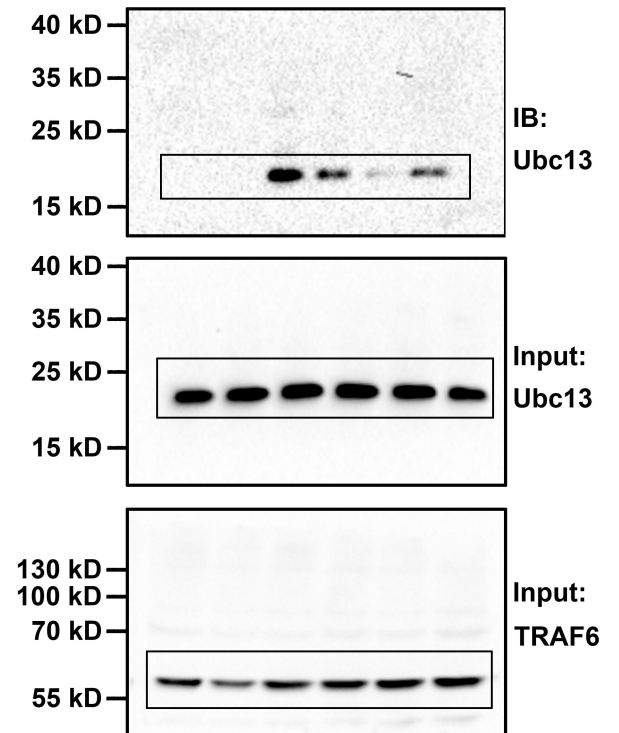

Figure 5l

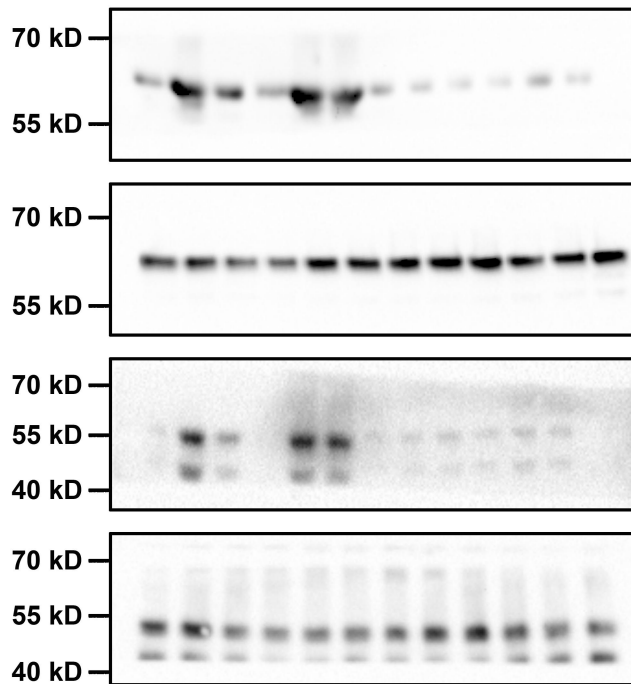

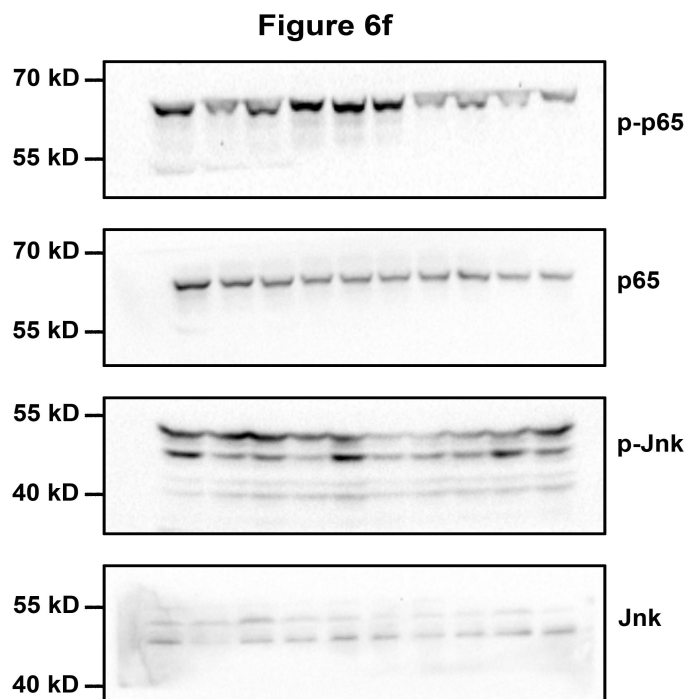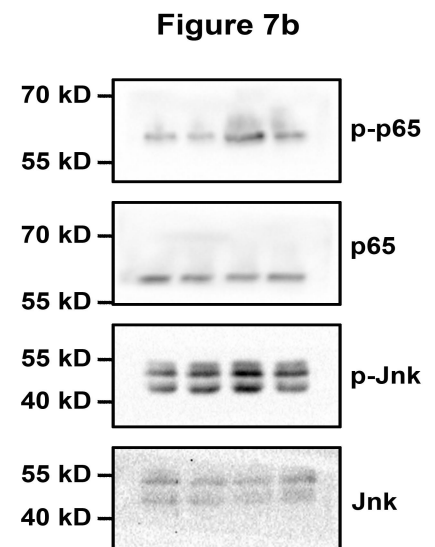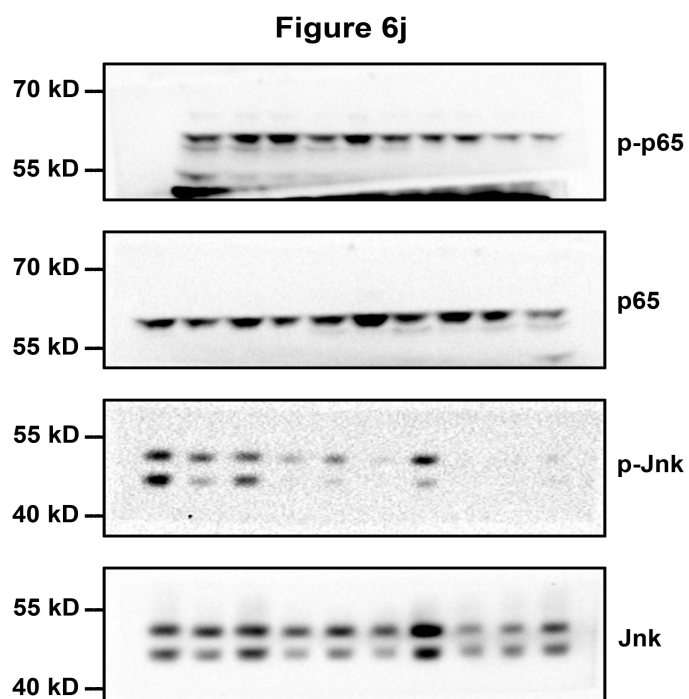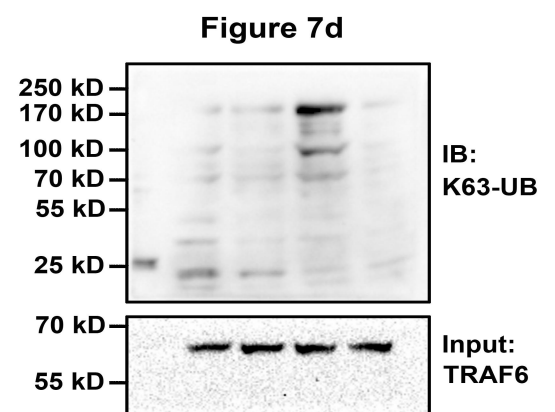

**Supplementary Figure 8. Uncropped scans of western blots included in main figures.**

**Supplementary Table 1. qRT-PCR primers used**

| <b>Gene</b>    | <b>Forward primer</b>   | <b>Reverse primer</b>   |
|----------------|-------------------------|-------------------------|
| Mirt2          | TCAACACTTTCCATAGGT      | ATTGTGAGGTCCAGATAG      |
| TNF            | CAGGCGGTGCCTATGTCTC     | CGATCACCCCGAAGTTCAGTAG  |
| IL-1 $\beta$   | GAAATGCCACCTTTTGACAGTG  | TGGATGCTCTCATCAGGACAG   |
| IL-6           | CTGCAAGAGACTTCCATCCAG   | AGTGGTATAGACAGGTCTGTTGG |
| IL-12          | AGACATCACACGGGACCAAAC   | CCAGGCAACTCTCGTTCTTGT   |
| IFN- $\beta$   | AGCTCCAAGAAAGGACGAACA   | GCCCTGTAGGTGAGGTTGAT    |
| isg15          | GGTGTCCGTGACTAACTCCAT   | TGGAAAGGGTAAGACCGTCCT   |
| MCP1           | TAAAAACCTGGATCGGAACCAAA | GCATTAGCTTCAGATTACGGGT  |
| IL-23 $\alpha$ | CAGCAGCTCTCTCGGAATCTC   | TGGATACGGGGCACATTATTTTT |
| CXCL9          | GGAGTTCGAGGAACCCTAGTG   | GGGATTTGTAGTGGATCGTGC   |
| CXCL10         | CCAAGTGCTGCCGTCATTTTC   | GGCTCGCAGGGATGATTTCAA   |
| Arg1           | CTCCAAGCCAAAGTCCTTAGAG  | GGAGCTGTCATTAGGGACATCA  |
| CD206          | CTCTGTTCAGCTATTGGACGC   | CGGAATTTCTGGGATTCAGCTTC |
| Mgl1           | CAATGTGGTTAGTTGGATCGGC  | CCCAGTTCTTAAAGCCTTTCTCA |
| Fizz1          | CCAATCCAGCTAACTATCCCTCC | ACCCAGTAGCAGTCATCCCA    |
| Ym1            | CAGGTCTGGCAATTCTTCTGAA  | GTCTTGCTCATGTGTGTAAGTGA |
| CCL22          | CTCTGCCATCACGTTTAGTGAA  | GACGGTTATCAAAACAACGCC   |
| CCL24          | ATTCTGTGACCATCCCCTCAT   | TGTATGTGCCTCTGAACCCAC   |
| CCL26          | TTCTTCGATTTGGGTCTCCTTG  | GTGCAGCTCTTGTCGGTGAA    |
